# Supplementary material for: Encapsulation of large dye molecules in hierarchically superstructured metal–organic frameworks
Source: Royal Society of Chemistry journal article supplement (doi:10.1039/c4dt02516d), 2014-01-01
Supplement: c4dt02516d1.pdf [file c4dt02516d1.pdf]

## Supporting Information

### **Encapsulation of Large Dye Molecules in Hierarchically Superstructured Metal-Organic Frameworks**

*Yanfeng Yue, Andrew J. Binder, Ruijing Song, Yuanjing Cui,\* Jihua Chen, Dale K. Hensley, and Sheng Dai\**

The details:

1. Experimental and measurements
2. Powder XRD patterns of mesoporous MOFs
3. Powder XRD patterns of RB@IRMOF-3 composite
4. Nitrogen –196 °C isotherms of RB@IRMOF-3 composite
5. Emission spectra of RB solution in ethanol and RB@IRMOF-3 composite
6. Fluorescence spectra of RB@IRMOF3 treated with methanol and ethanediol
7. The emission peak-height ratios between ligand and dye moieties
8. The porosity details of these hierarchical MOF series



## 1. Experimental and measurements

**Materials.** The ligand of 1,4-benzenedicarboxylic acid ( $\text{H}_2\text{BDC}$ ), 2-amino-1,4-benzenedicarboxylic acid ( $\text{NH}_2\text{H}_2\text{BDC}$ ), 1,2,4,5-benzenetetracarboxylic acid ( $\text{H}_4\text{BTEC}$ ), Rhodamine B (RB), and solvent (dimethylformamide, DMF) and metal salts (zinc acetate and copper acetate) were purchased from Aldrich Chemical Co. Inc.. All materials were used without further purification.

**Synthesis of hierarchical IRMOF-3.** A 20 mL DMF solution of  $\text{NH}_2\text{H}_2\text{BDC}$  (0.10 g, 0.55 mmol) was added to a 20 mL DMF solution of 0.343 g, 1.57 mmol,  $\text{Zn}(\text{OAc})_2 \cdot 2\text{H}_2\text{O}$  under stirring. The mixture was stirred for 4 hours at room temperature, with the speed of magnetic bar being 1200 cycles/minute. The resulting white-off precipitate was separated by centrifugation, washed with dimethylformamide and methanol, subsequently dried under vacuum at 60 °C overnight before characterizations.

**Synthesis of hierarchical Cu-BDC.** A 20 mL DMF solution of  $\text{H}_2\text{BDC}$  (0.166 g, 1.0 mmol) was added to a 20 mL DMF solution of 0.199 g, 1.0 mmol,  $\text{Cu}(\text{OAc})_2 \cdot \text{H}_2\text{O}$  under stirring. The mixture was stirred for 48 hours at room temperature, with the speed of magnetic bar being 1200 cycles/minute. The resulting blue precipitate was separated by centrifugation, washed with dimethylformamide and methanol subsequently; then the solid was dried under vacuum at 60 °C overnight before characterizations.

**Synthesis of hierarchical Cu-BTEC.** A 20 mL DMF solution of  $\text{H}_4\text{BTEC}$  (0.254 g, 1.0 mmol) was added to a 20 mL DMF solution of 0.498 g, 2.5 mmol,  $\text{Cu}(\text{OAc})_2 \cdot \text{H}_2\text{O}$  under stirring. The mixture was stirred for 24 hours at room temperature, with the speed of magnetic bar being 1200 cycles/minute. The resulting blue precipitate was separated by



centrifugation, washed with DMF and methanol, subsequently dried under vacuum at 60 °C overnight.

**Synthesis of RB@hierarchical IRMOF-3.** A 20 mL DMF solution of  $\text{NH}_2\text{H}_2\text{BDC}$  (0.10 g, 0.55 mmol) and 0.05 g Rhodamine B was added to a 20 mL DMF solution of 0.343 g, 1.57 mmol,  $\text{Zn}(\text{OAc})_2 \cdot 2\text{H}_2\text{O}$  under stirring. The mixture was stirred for 4 hours at room temperature, with the speed of magnetic bar being 1200 cycles/minute. The resulting precipitate was separated by centrifugation, washed with dimethylformamide and methanol, subsequently dried under vacuum at 60 °C overnight before characterizations.

**Powder X-ray Diffraction (XRD).** Powder X-ray Diffraction (XRD) analysis of these nanoporous materials was used to confirm the crystallinity as well as the phase purity of the bulk materials. Powder XRD patterns were recorded on a PANalytical Empyrean diffractometer equipped with  $\text{Cu K}\alpha$  radiation ( $\lambda = 1.5406 \text{ \AA}$ ).

**Gas Adsorption Analysis.** Gas adsorption studies were done to confirm the permanent porosity of the nanoporous MOF materials as well as to determine the surface area. Gas adsorption experiments were performed on a Micromeritics Tristar 3000 at 77 K. Samples (around 100 mg) were activated for 6 hours at 150 °C under nitrogen flow and subsequently loaded for adsorption analysis.

**Scanning Transmission Electron Microscopy (STEM).** Scanning transmission electron microscope (STEM) images were recorded using a Hitachi HD2000 STEM microscope operating at 200 kV. Samples for STEM analysis were prepared by drop casting: one drop of the sample dispersion in ethanol was dropped onto a copper grid and allowed to dry at ambient temperature before being subjected to STEM analysis.



**The Photoluminescence (PL) Spectra.** The RB@IRMOF3 were exposed to different solvents, such as orthodichlorobenzene, chlorobenzene, benzene, toluene, *p*-xylene, methanol, and ethanediol for 10 min, then the luminescent spectra for the samples were recorded by a Hitachi F4600 fluorescence spectrometer. The photomultiplier tube voltage was 750 V and the scan speed was 240 nm/min, while the slit widths of excitation and emission spectra were 2.5 nm and 2.5 nm.



## 2. Powder XRD patterns of mesoporous MOFs

*a*

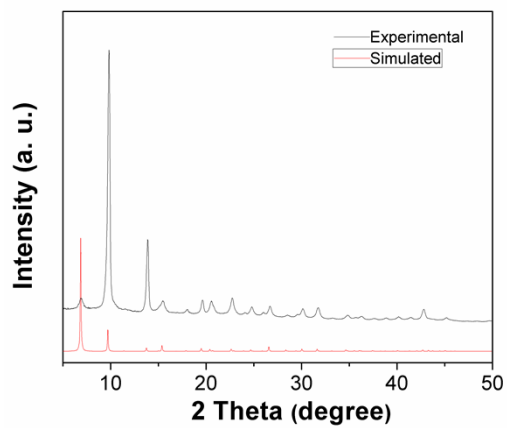

*b*

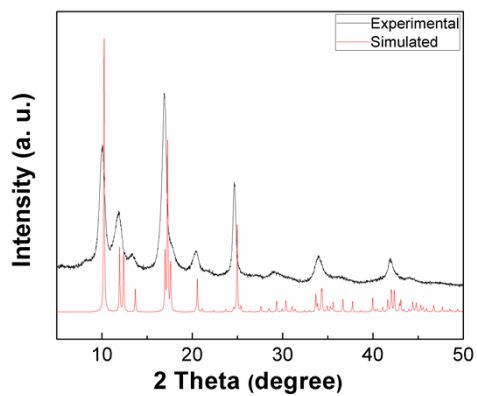

*c*

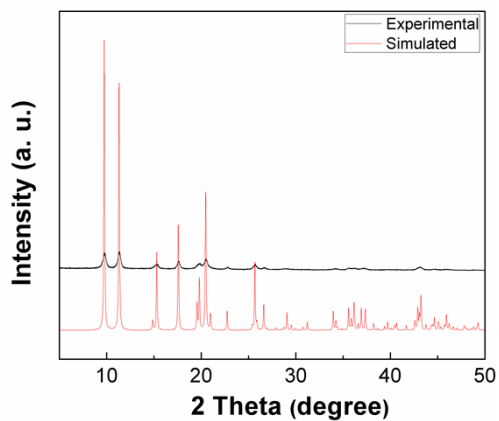

Figure S1. Powder XRD patterns of IRMOF-3 (*a*), Cu-BDC (*b*), and Cu-BTEC (*c*).



### 3. Powder XRD patterns of RB@IRMOF-3 composite

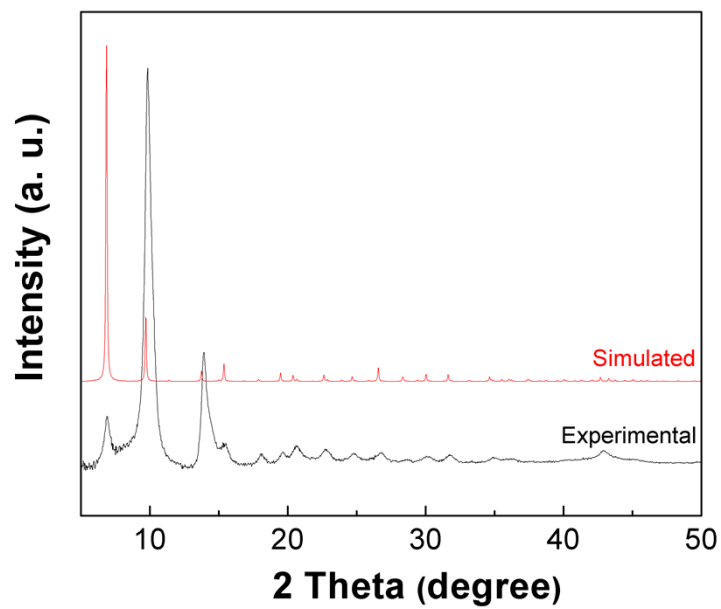

Figure S2. Powder XRD patterns of RB@IRMOF-3 composite.



#### 4. Nitrogen – 196 °C isotherms of RB@IRMOF-3 composite

*a*

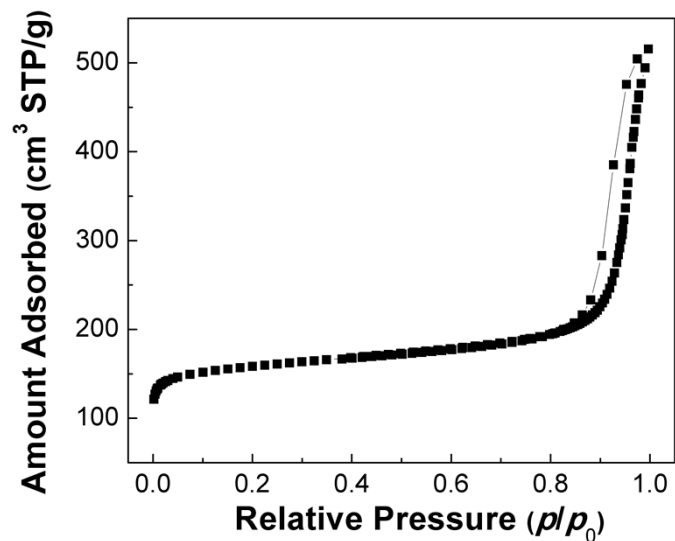

*b*

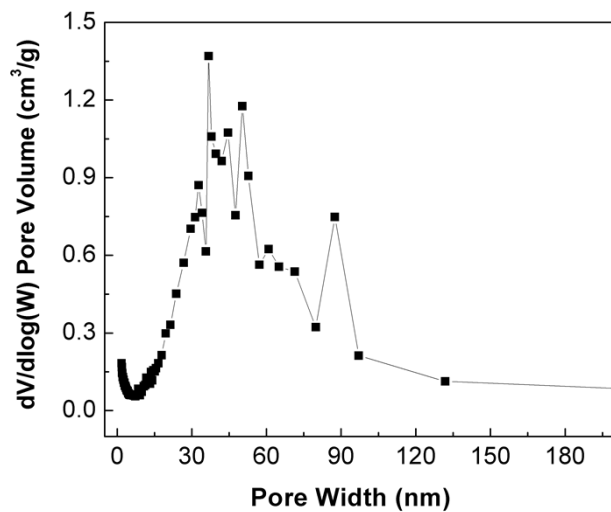

Figure S3. Nitrogen – 196 °C isotherms of RB@IRMOF-3 composite (*a*) and PSD curve (*b*).



## 5. Emission spectra of RB solution in ethanol and RB@IRMOF-3 composite

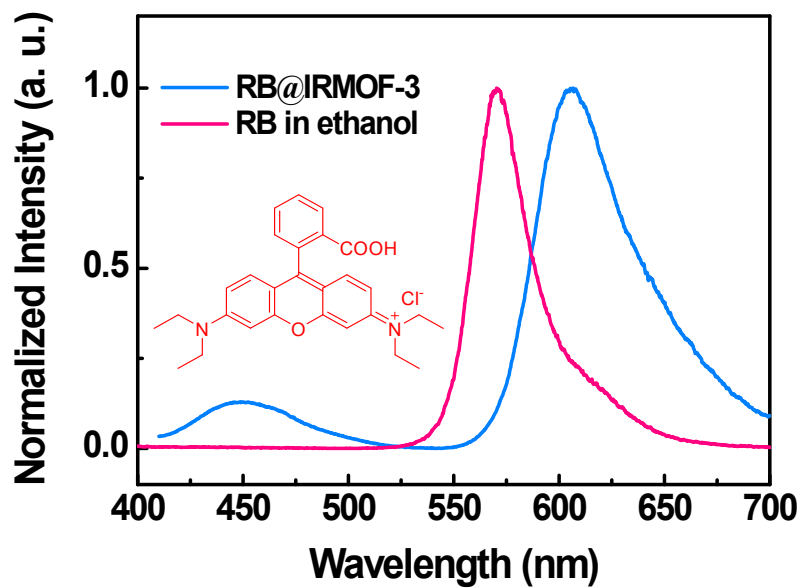

Figure S4. Emission spectra of RB solution in ethanol and RB@IRMOF-3 excited at 355 nm; the molecular structure of PB (inset)



## 6. Fluorescence spectra of RB@IRMOF3 treated with methanol and ethanediol

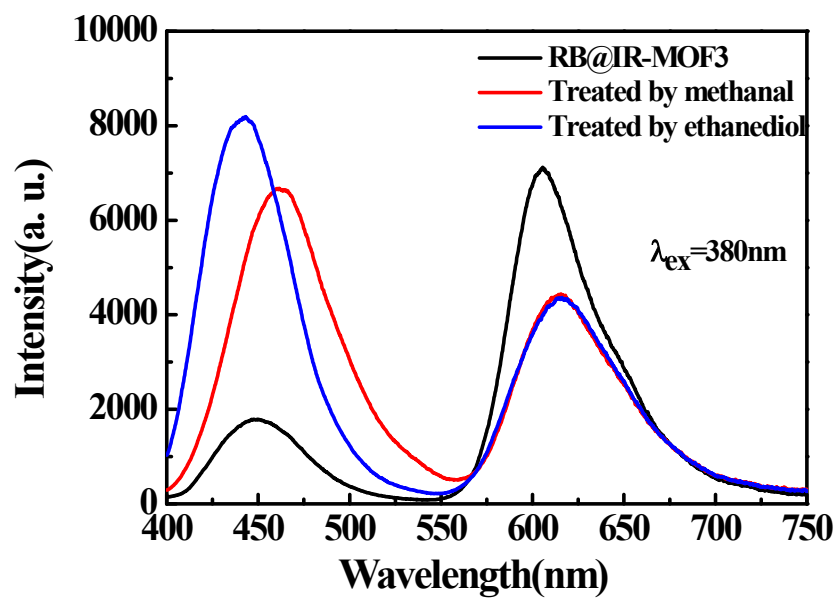

Figure S5. Fluorescence spectra of RB@IRMOF-3 treated with methanol and ethanediol.



## 7. The emission peak-height ratios between ligand and dye moieties

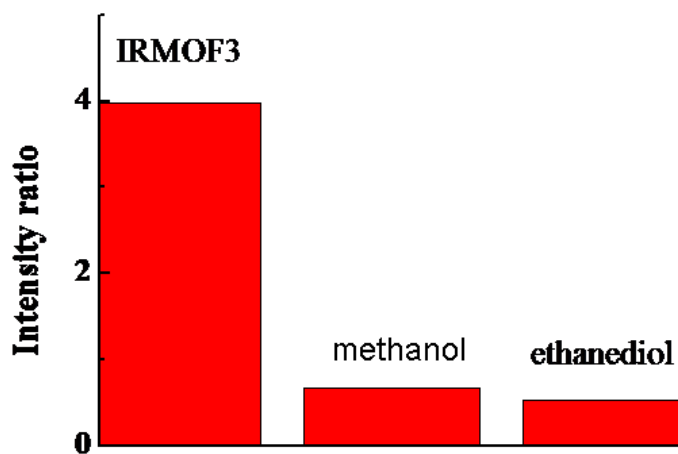

Figure S6. The emission peak-height ratios between ligand and dye moieties in RB@IRMOF-3 treated with methanol, ethanediol excited at 380 nm in the solid state at room temperature.



**8. Table S1. The porosity details of hierarchical MOF materials<sup>†</sup>**

| Samples    | $V_{SP}$<br>(cm <sup>3</sup> /g) <sup>a</sup> | $S_{BET}$<br>(m <sup>2</sup> /g) <sup>b</sup> | $V_{mi}$<br>(cm <sup>3</sup> /g) <sup>c</sup> | $100(V_{mi}/V_{SP})^d$ | $w$ (nm) <sup>e</sup> |
|------------|-----------------------------------------------|-----------------------------------------------|-----------------------------------------------|------------------------|-----------------------|
| IRMOF-3    | 0.41                                          | 248.4                                         | 0.05                                          | 12                     | 19.4                  |
| Cu-BDC     | 0.23                                          | 107                                           | 0.01                                          | 4                      | 13.7                  |
| Cu-BETC    | 0.38                                          | 226                                           | — <sup>f</sup>                                | —                      | 8.1                   |
| RB@IRMOF-3 | 0.76                                          | 541.1                                         | 0.19                                          | 0.25                   | 36.7                  |

<sup>†</sup>a single point pore volume taken at  $p/p_0 \sim 0.98$ ; <sup>b</sup>specific surface area calculated in the  $p/p_0$  range of 0.05 – 0.20; <sup>c</sup>micropore volume calculated in the  $t$ -plot range of 0.35–0.5; <sup>d</sup>approximate  $t$ -plot micropore to total pore volume percent ratio; <sup>e</sup>mesopore width from the maximum of the calculated PSDs; <sup>f</sup>data not obtained due to have no micropores in the product.
